# Supplementary material for: Outlier Analysis Defines Zinc Finger Gene Family DNA Methylation in Tumors and Saliva of Head and Neck Cancer Patients
Source: PLOS journal article supplement (doi:10.1371/journal.pone.0142148), 2015-11-06
Supplement: S4 (10.1371/journal.pone.0142148.s004) [file journal.pone.0142148.s004]

**Table S1. Clinical characteristics of HNSCC patients in the initial discovery cohort**

|                           | <b>HNSCC (n = 44)</b> | <b>Normal samples (n = 25)</b> |
|---------------------------|-----------------------|--------------------------------|
|                           | <b>n (%)</b>          | <b>n (%)</b>                   |
| <b>Median age (range)</b> | 58±13 (45-80)         | 29±12 (18-65)                  |
| <b>Male</b>               | 32 (73%)              | 9 (36%)                        |
| <b>Female</b>             | 12 (27%)              | 16 (64%)                       |
| <b>Race</b>               |                       |                                |
| Caucasian                 | 40 (91%)              | 14 (56%)                       |
| African American          | 3 (7%)                | 11 (44%)                       |
| Others                    | 1 (2%)                |                                |
| <b>Smoking status</b>     |                       |                                |
| Pack-years, mean (range)  | 39.7 (4-125)          | 29 (8-50)                      |
| Smokers                   | 27 (61%)              | 3 (12%)                        |
| Non-smokers               | 12 (28%)              | 22 (88%)                       |
| Unknown                   | 5 (11%)               |                                |
| <b>Drinking status</b>    |                       |                                |
| Drink                     | 25 (57%)              | 9 (36%)                        |
| Do not drink              | 12 (27%)              | 16 (64%)                       |
| Unknown                   | 7 (16%)               |                                |
| <b>HPV16 positive</b>     | 13 (30%)              |                                |
| <b>Tumor site</b>         |                       |                                |
| Oral cavity               | 10 (23%)              |                                |
| Oropharynx                | 17 (38%)              |                                |
| Larynx                    | 13 (30%)              |                                |
| Hypopharynx               | 4 (9%)                |                                |
| <b>TNM stage</b>          |                       |                                |
| I                         | 5 (11%)               |                                |
| II                        | 2 (5%)                |                                |
| III                       | 5 (11%)               |                                |
| IV                        | 32 (73%)              |                                |
| <b>Disease status</b>     |                       |                                |
| No evidence of disease    | 22 (50%)              |                                |
| Alive with disease        | 1 (2%)                |                                |
| Dead of disease           | 18 (41%)              |                                |
| Dead of unrelated causes  | 3 (7%)                |                                |
