# Supplementary material for: Outlier Analysis Defines Zinc Finger Gene Family DNA Methylation in Tumors and Saliva of Head and Neck Cancer Patients
Source: PLOS journal article supplement (doi:10.1371/journal.pone.0142148), 2015-11-06
Supplement: S5 (10.1371/journal.pone.0142148.s005) [file journal.pone.0142148.s005]

**Table S2. Clinical characteristics of HNSCC patients in the validation cohort**

|                                 | <b>HNSCC (n = 59)</b> | <b>Normal tissue (n = 31)</b> | <b>Normal saliva (n = 35)</b> |
|---------------------------------|-----------------------|-------------------------------|-------------------------------|
|                                 | <b>n (%)</b>          | <b>n (%)</b>                  | <b>n (%)</b>                  |
| <b>Median age (range)</b>       | 59±12 (35-87)         | 32±11 (18-57)                 | 58±12 (32-77)                 |
| <b>Male</b>                     | 47 (80%)              | 16 (52%)                      | 12 (34%)                      |
| <b>Female</b>                   | 12 (20%)              | 15 (48%)                      | 23 (66%)                      |
| <b>Race</b>                     |                       |                               |                               |
| <b>Caucasian</b>                | 52 (88%)              | 16 (52%)                      | 25 (71%)                      |
| <b>African American</b>         | 5 (9%)                | 12 (38%)                      | 7 (20%)                       |
| <b>Others</b>                   | 2 (3%)                | 3 (10%)                       | 3 (9%)                        |
| <b>Smoking status</b>           |                       |                               |                               |
| <b>Pack-years (range)</b>       | 43.1 (5-110)          | 73.9 (3-274)                  | 280 (183-730)                 |
| <b>Smokers</b>                  | 47 (80%)              | 9 (29%)                       | 18 (51%)                      |
| <b>Non-smokers</b>              | 12 (20%)              | 22 (71%)                      | 17 (49%)                      |
| <b>Drinking status</b>          |                       |                               |                               |
| <b>Drink</b>                    | 34 (58%)              | 4 (13%)                       | 24 (69%)                      |
| <b>Do not drink</b>             | 19 (32%)              | 27 (87%)                      | 11 (31%)                      |
| <b>Unknown</b>                  | 6 (10%)               |                               |                               |
| <b>HPV16 positive</b>           | 18 (31%)              |                               |                               |
| <b>Tumor site</b>               |                       |                               |                               |
| <b>Oral cavity</b>              | 15 (26%)              |                               |                               |
| <b>Oropharynx</b>               | 25 (42%)              |                               |                               |
| <b>Larynx</b>                   | 17 (29%)              |                               |                               |
| <b>Hypopharynx</b>              | 2 (3%)                |                               |                               |
| <b>TNM stage</b>                |                       |                               |                               |
| <b>I</b>                        | 5 (9%)                |                               |                               |
| <b>II</b>                       | 10 (17%)              |                               |                               |
| <b>III</b>                      | 9 (15%)               |                               |                               |
| <b>IV</b>                       | 32 (54%)              |                               |                               |
| <b>Unknown</b>                  | 3 (5%)                |                               |                               |
| <b>Disease status</b>           |                       |                               |                               |
| <b>No evidence of disease</b>   | 34 (58%)              |                               |                               |
| <b>Alive with disease</b>       | 7 (12%)               |                               |                               |
| <b>Dead of disease</b>          | 7 (12%)               |                               |                               |
| <b>Dead of unrelated causes</b> | 11 (18%)              |                               |                               |
