# Supplementary material for: Outlier Analysis Defines Zinc Finger Gene Family DNA Methylation in Tumors and Saliva of Head and Neck Cancer Patients
Source: PLOS journal article supplement (doi:10.1371/journal.pone.0142148), 2015-11-06
Supplement: S10 (10.1371/journal.pone.0142148.s010) [file journal.pone.0142148.s010]

**Table S7. Bisulfite sequencing of the promoter DNA  
hypermethylation detection in primary tissues from HNSCC  
and non-cancerous patients of the validation cohort**

|                | Percentage of<br>patients with hemi<br>or fully<br>methylated<br>promoters,<br>detected in<br>primary tumor<br>tissues | Percentage of<br>patients with hemi<br>or fully<br>methylated<br>promoters,<br>detected in<br>normal tissues | Fisher's<br>exact test |
|----------------|------------------------------------------------------------------------------------------------------------------------|--------------------------------------------------------------------------------------------------------------|------------------------|
|                | %                                                                                                                      | %                                                                                                            | p-value                |
| <b>ZNF14</b>   | 43.8                                                                                                                   | 0                                                                                                            | <b>&lt;0.0001</b>      |
| <b>ZNF141</b>  | 9.4                                                                                                                    | 78.6                                                                                                         | <b>&lt;0.0001</b>      |
| <b>ZNF160</b>  | 46.9                                                                                                                   | 14.3                                                                                                         | <b>0.0011</b>          |
| <b>ZNF211</b>  | 0.0                                                                                                                    | 0                                                                                                            | ND                     |
| <b>ZNF420</b>  | 25.0                                                                                                                   | 0                                                                                                            | <b>0.0018</b>          |
| <b>ZNF585B</b> | 34.4                                                                                                                   | 0                                                                                                            | <b>&lt;0.0001</b>      |
| <b>ZNF71</b>   | 37.5                                                                                                                   | 0                                                                                                            | <b>&lt;0.0001</b>      |
