# Supplementary material for: Outlier Analysis Defines Zinc Finger Gene Family DNA Methylation in Tumors and Saliva of Head and Neck Cancer Patients
Source: PLOS journal article supplement (doi:10.1371/journal.pone.0142148), 2015-11-06
Supplement: S12 (10.1371/journal.pone.0142148.s012) [file journal.pone.0142148.s012]

**Table S9. Comparison of the promoter DNA hypermethylation detection in all primary tissues from HNSCC and non-cancerous patients from three cohorts using four different DNA methylation detection techniques**

|               |                            | Discovery Cohort             | Validation Cohort    |      | TCGA                         |
|---------------|----------------------------|------------------------------|----------------------|------|------------------------------|
|               |                            | DNA methylation array<br>27K | Bisulfite Sequencing | QMSP | DNA methylation<br>array 450 |
|               |                            | %                            | %                    | %    | %                            |
| <b>ZNF14</b>  | Detection in tumor samples | 41                           | 43.8                 | 44.1 | 40.5                         |
|               | Detection in normal        | 0                            | 0                    | 0    | 0                            |
| <b>ZNF160</b> | Detection in tumor samples | 25                           | 46.9                 | 39   | 34.8                         |
|               | Detection in normal        | 0                            | 14.3                 | 0    | 0                            |
| <b>ZNF420</b> | Detection in tumor samples | 34                           | 25                   | 32.2 | 48                           |
|               | Detection in normal        | 0                            | 0                    | 0    | 0                            |

For the array data the detection cut-off for each gene was set as normal mean plus 3 standard deviations. For QMSP data the cut of was DNA methylation detection at 38 PCR cycles.
